# Supplementary material
Source: publisher site journal article supplement (https://www.spandidos-publications.com/1984/downloadSupplementary)

Figure S1. Docetaxel resistance in A549/DTX cells. \*\* $P < 0.01$  and \*\*\* $P < 0.001$ . NS, not significant.

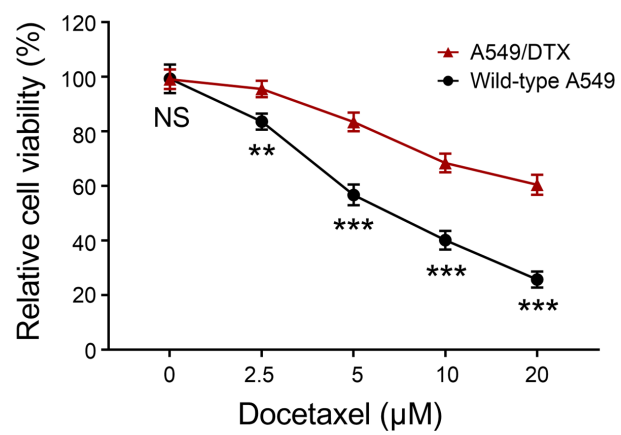

Supplement: Supplementary file 1 [file downloadSupplementary]
